# Supplementary material for: Ocean acidification changes the vertical movement of stone crab larvae
Source: Biol Lett. 2019 Dec 11;15(12):20190414. doi: 10.1098/rsbl.2019.0414 (PMC6936016; doi:10.1098/rsbl.2019.0414)
Supplement: Stage-III geotaxis data [file rsbl20190414supp3.csv]

Brood	Temp	CO2	Treatment	Up	Down		Ocean acidification changes the vertical movement of stone crab larvae
A	Ambient	Ambient	Control	60	-40
B	Ambient	Ambient	Control	80	-20		Authors: Philip M. Gravinese*, Ian C. Enochs, Derek P. Manzello, and Robert van Woesik
C	Ambient	Ambient	Control	60	-40
D	Ambient	Ambient	Control	60	-40
E	Ambient	Ambient	Control	70	-30
F	Ambient	Ambient	Control	100	0
G	Ambient	Ambient	Control	40	-60
A	Elevated	Ambient	Elevated Temperature	90	-10
B	Elevated	Ambient	Elevated Temperature	80	-20
C	Elevated	Ambient	Elevated Temperature	60	-40
D	Elevated	Ambient	Elevated Temperature	70	-30
E	Elevated	Ambient	Elevated Temperature	80	-20
F	Elevated	Ambient	Elevated Temperature	60	-40
G	Elevated	Ambient	Elevated Temperature	50	-50
A	Ambient	Elevated	Reduced pH	40	-60
B	Ambient	Elevated	Reduced pH	40	-60
C	Ambient	Elevated	Reduced pH	20	-80
D	Ambient	Elevated	Reduced pH	0	-100
E	Ambient	Elevated	Reduced pH	20	-80
F	Ambient	Elevated	Reduced pH	10	-90
G	Ambient	Elevated	Reduced pH	20	-80
A	Elevated	Elevated	Reduced pH + Elevated Temperature	50	-50
B	Elevated	Elevated	Reduced pH + Elevated Temperature	10	-90
C	Elevated	Elevated	Reduced pH + Elevated Temperature	10	-90
D	Elevated	Elevated	Reduced pH + Elevated Temperature	0	-100
E	Elevated	Elevated	Reduced pH + Elevated Temperature	20	-80
F	Elevated	Elevated	Reduced pH + Elevated Temperature	40	-60
G	Elevated	Elevated	Reduced pH + Elevated Temperature	0	-100
