# Supplementary material for: Ocean acidification changes the vertical movement of stone crab larvae
Source: Biol Lett. 2019 Dec 11;15(12):20190414. doi: 10.1098/rsbl.2019.0414 (PMC6936016; doi:10.1098/rsbl.2019.0414)
Supplement: Stage-III swimming data all [file rsbl20190414supp4.csv]

Brood	Treatment	direction	speed_full		Ocean acidification changes the vertical movement of stone crab larvae
A	Control	up	0.5
A	Control	up	0.31		Authors: Philip M. Gravinese*, Ian C. Enochs, Derek P. Manzello, and Robert van Woesik
A	Control	down	-0.12
A	Control	down	-0.06
A	Control	down	-0.35
A	Control	up	0.26
A	Control	down	-0.03
A	Control	up	0.31
A	Control	up	0.07
A	Control	up	0.15
B	Control	up	0.55
B	Control	up	0.83
B	Control	up	1.4
B	Control	up	0.56
B	Control	up	0.96
B	Control	up	0.33
B	Control	up	0.41
B	Control	down	-0.13
B	Control	up	0.69
B	Control	down	-0.15
C	Control	down	-0.86
C	Control	up	0.43
C	Control	up	0.74
C	Control	down	-0.85
C	Control	up	0.19
C	Control	up	0.57
C	Control	up	0.64
C	Control	down	-0.56
C	Control	down	-0.17
C	Control	up	0.67
D	Control	up	0.08
D	Control	up	0.29
D	Control	up	0.04
D	Control	up	0.05
D	Control	down	-0.22
D	Control	down	-0.18
D	Control	up	0.15
D	Control	neutral	0
D	Control	down	-0.14
D	Control	up	0.06
E	Control	up	0.58
E	Control	down	-0.13
E	Control	up	0.23
E	Control	up	0.09
E	Control	down	-0.1
E	Control	down	-0.17
E	Control	up	0.18
E	Control	up	0.5
E	Control	up	0.35
E	Control	up	0.06
F	Control	up	0.8
F	Control	up	0.53
F	Control	up	0.52
F	Control	up	0.63
F	Control	up	0.49
F	Control	up	0.68
F	Control	up	0.92
F	Control	up	0.98
F	Control	up	0.68
F	Control	up	0.9
G	Control	down	-0.2
G	Control	down	-0.22
G	Control	up	0.8
G	Control	down	-0.15
G	Control	up	0.15
G	Control	down	-0.14
G	Control	up	0.18
G	Control	neutral	0
G	Control	down	-0.05
G	Control	up	0.23
A	Elevated Temperature	up	0.03
A	Elevated Temperature	up	0.3
A	Elevated Temperature	up	0.62
A	Elevated Temperature	up	0.15
A	Elevated Temperature	up	0.31
A	Elevated Temperature	up	0.12
A	Elevated Temperature	neutral	0
A	Elevated Temperature	up	0.21
A	Elevated Temperature	up	0.36
A	Elevated Temperature	up	0.26
B	Elevated Temperature	down	-0.52
B	Elevated Temperature	up	0.51
B	Elevated Temperature	up	0.04
B	Elevated Temperature	down	-0.34
B	Elevated Temperature	up	0.35
B	Elevated Temperature	up	0.1
B	Elevated Temperature	up	0.08
B	Elevated Temperature	up	0.27
B	Elevated Temperature	up	0.4
B	Elevated Temperature	up	0.35
C	Elevated Temperature	down	-0.71
C	Elevated Temperature	down	-0.1
C	Elevated Temperature	up	0.68
C	Elevated Temperature	down	-0.56
C	Elevated Temperature	up	0.29
C	Elevated Temperature	down	-0.25
C	Elevated Temperature	up	0.16
C	Elevated Temperature	up	0.36
C	Elevated Temperature	up	0.25
C	Elevated Temperature	up	0.42
D	Elevated Temperature	down	-0.08
D	Elevated Temperature	up	0.38
D	Elevated Temperature	up	0.1
D	Elevated Temperature	down	-0.1
D	Elevated Temperature	up	0.14
D	Elevated Temperature	up	0.25
D	Elevated Temperature	up	0.08
D	Elevated Temperature	down	-0.07
D	Elevated Temperature	up	0.3
D	Elevated Temperature	up	0.12
E	Elevated Temperature	down	-0.22
E	Elevated Temperature	up	0.86
E	Elevated Temperature	down	-0.16
E	Elevated Temperature	up	0.38
E	Elevated Temperature	up	0.07
E	Elevated Temperature	up	0.09
E	Elevated Temperature	up	0.16
E	Elevated Temperature	up	0.18
E	Elevated Temperature	up	0.06
E	Elevated Temperature	up	0.42
F	Elevated Temperature	up	0.35
F	Elevated Temperature	down	-0.3
F	Elevated Temperature	down	-0.5
F	Elevated Temperature	up	0.83
F	Elevated Temperature	up	0.1
F	Elevated Temperature	up	0.16
F	Elevated Temperature	down	-0.11
F	Elevated Temperature	up	0.6
F	Elevated Temperature	up	0.3
F	Elevated Temperature	down	-0.7
G	Elevated Temperature	up	0.22
G	Elevated Temperature	down	-0.56
G	Elevated Temperature	up	0.3
G	Elevated Temperature	neutral	0
G	Elevated Temperature	up	0.28
G	Elevated Temperature	up	0.32
G	Elevated Temperature	down	-0.33
G	Elevated Temperature	down	-0.43
G	Elevated Temperature	down	-0.31
G	Elevated Temperature	up	0.24
A	Reduced pH	down	-0.44
A	Reduced pH	up	0.28
A	Reduced pH	up	0.3
A	Reduced pH	up	0.2
A	Reduced pH	up	0.3
A	Reduced pH	down	-0.27
A	Reduced pH	down	-0.28
A	Reduced pH	down	-0.37
A	Reduced pH	down	-0.03
A	Reduced pH	down	-0.27
B	Reduced pH	down	-0.2
B	Reduced pH	down	-0.34
B	Reduced pH	down	-0.5
B	Reduced pH	down	-0.31
B	Reduced pH	up	0.7
B	Reduced pH	down	-0.22
B	Reduced pH	up	0.6
B	Reduced pH	up	0.8
B	Reduced pH	neutral	0
B	Reduced pH	up	0.78
C	Reduced pH	down	-1.13
C	Reduced pH	down	-1
C	Reduced pH	up	0.4
C	Reduced pH	down	-0.81
C	Reduced pH	up	0.67
C	Reduced pH	down	-0.8
C	Reduced pH	down	-0.77
C	Reduced pH	down	-0.7
C	Reduced pH	down	-1.12
C	Reduced pH	down	-0.87
D	Reduced pH	down	-1
D	Reduced pH	down	-0.64
D	Reduced pH	down	-0.5
D	Reduced pH	down	-0.36
D	Reduced pH	down	-0.31
D	Reduced pH	down	-0.26
D	Reduced pH	down	-0.28
D	Reduced pH	neutral	0
D	Reduced pH	down	-0.53
D	Reduced pH	down	-0.49
E	Reduced pH	down	-0.68
E	Reduced pH	up	0.25
E	Reduced pH	down	-0.7
E	Reduced pH	down	-0.68
E	Reduced pH	down	-0.61
E	Reduced pH	down	-0.73
E	Reduced pH	down	-0.73
E	Reduced pH	down	-0.75
E	Reduced pH	up	0.31
E	Reduced pH	down	-0.64
F	Reduced pH	down	-0.27
F	Reduced pH	down	-0.53
F	Reduced pH	down	-0.49
F	Reduced pH	down	-0.44
F	Reduced pH	down	-0.34
F	Reduced pH	down	-0.24
F	Reduced pH	down	-0.31
F	Reduced pH	down	-0.12
F	Reduced pH	up	0.71
F	Reduced pH	down	-0.34
G	Reduced pH	neutral	0
G	Reduced pH	down	-0.56
G	Reduced pH	down	-0.62
G	Reduced pH	down	-0.56
G	Reduced pH	down	-0.79
G	Reduced pH	down	-0.73
G	Reduced pH	up	0.35
G	Reduced pH	down	-0.46
G	Reduced pH	down	-0.64
G	Reduced pH	up	0.25
A	Elevated Temperature + Reduced pH	up	0.1
A	Elevated Temperature + Reduced pH	up	0.21
A	Elevated Temperature + Reduced pH	up	0.3
A	Elevated Temperature + Reduced pH	down	-0.24
A	Elevated Temperature + Reduced pH	down	-0.21
A	Elevated Temperature + Reduced pH	down	-0.27
A	Elevated Temperature + Reduced pH	up	0.06
A	Elevated Temperature + Reduced pH	up	0.23
A	Elevated Temperature + Reduced pH	down	-0.35
A	Elevated Temperature + Reduced pH	down	-0.13
B	Elevated Temperature + Reduced pH	down	-0.29
B	Elevated Temperature + Reduced pH	down	-0.43
B	Elevated Temperature + Reduced pH	down	-0.5
B	Elevated Temperature + Reduced pH	down	-0.49
B	Elevated Temperature + Reduced pH	down	-0.47
B	Elevated Temperature + Reduced pH	up	0.1
B	Elevated Temperature + Reduced pH	down	-0.53
B	Elevated Temperature + Reduced pH	down	-0.51
B	Elevated Temperature + Reduced pH	down	-0.6
B	Elevated Temperature + Reduced pH	down	-0.61
C	Elevated Temperature + Reduced pH	down	-0.91
C	Elevated Temperature + Reduced pH	down	-0.84
C	Elevated Temperature + Reduced pH	down	-0.57
C	Elevated Temperature + Reduced pH	down	-0.6
C	Elevated Temperature + Reduced pH	down	-0.3
C	Elevated Temperature + Reduced pH	up	0.1
C	Elevated Temperature + Reduced pH	down	-0.33
C	Elevated Temperature + Reduced pH	down	-0.41
C	Elevated Temperature + Reduced pH	down	-0.66
C	Elevated Temperature + Reduced pH	down	-0.52
D	Elevated Temperature + Reduced pH	down	-0.88
D	Elevated Temperature + Reduced pH	down	-0.58
D	Elevated Temperature + Reduced pH	down	-0.54
D	Elevated Temperature + Reduced pH	down	-0.39
D	Elevated Temperature + Reduced pH	down	-0.5
D	Elevated Temperature + Reduced pH	down	-0.25
D	Elevated Temperature + Reduced pH	down	-0.5
D	Elevated Temperature + Reduced pH	down	-0.59
D	Elevated Temperature + Reduced pH	neutral	0
D	Elevated Temperature + Reduced pH	down	-0.64
E	Elevated Temperature + Reduced pH	up	0.05
E	Elevated Temperature + Reduced pH	down	-0.64
E	Elevated Temperature + Reduced pH	down	-0.68
E	Elevated Temperature + Reduced pH	down	-0.59
E	Elevated Temperature + Reduced pH	down	-0.29
E	Elevated Temperature + Reduced pH	down	-0.35
E	Elevated Temperature + Reduced pH	down	-0.19
E	Elevated Temperature + Reduced pH	up	0.44
E	Elevated Temperature + Reduced pH	down	-0.35
E	Elevated Temperature + Reduced pH	down	-0.67
F	Elevated Temperature + Reduced pH	down	-0.21
F	Elevated Temperature + Reduced pH	down	-0.5
F	Elevated Temperature + Reduced pH	up	0.03
F	Elevated Temperature + Reduced pH	down	-0.63
F	Elevated Temperature + Reduced pH	up	0.19
F	Elevated Temperature + Reduced pH	down	-0.48
F	Elevated Temperature + Reduced pH	up	0.43
F	Elevated Temperature + Reduced pH	up	0.03
F	Elevated Temperature + Reduced pH	down	-0.33
F	Elevated Temperature + Reduced pH	down	-0.27
G	Elevated Temperature + Reduced pH	down	-0.43
G	Elevated Temperature + Reduced pH	down	-0.52
G	Elevated Temperature + Reduced pH	down	-0.27
G	Elevated Temperature + Reduced pH	down	-0.39
G	Elevated Temperature + Reduced pH	down	-0.18
G	Elevated Temperature + Reduced pH	neutral	0
G	Elevated Temperature + Reduced pH	down	-0.4
G	Elevated Temperature + Reduced pH	down	-0.51
G	Elevated Temperature + Reduced pH	down	-0.5
G	Elevated Temperature + Reduced pH	down	-0.5
