# Supplementary material for: Ocean acidification changes the vertical movement of stone crab larvae
Source: Biol Lett. 2019 Dec 11;15(12):20190414. doi: 10.1098/rsbl.2019.0414 (PMC6936016; doi:10.1098/rsbl.2019.0414)
Supplement: Stage-V geotaxis data [file rsbl20190414supp5.csv]

Brood	Temp	CO2	Treatment	Up	Down		Ocean acidification changes the vertical movement of stone crab larvae
A	1	1	Control	50	-50
B	1	1	Control	40	-60		Authors: Philip M. Gravinese*, Ian C. Enochs, Derek P. Manzello, and Robert van Woesik
C	1	1	Control	0	-100
D	1	1	Control	70	-30
E	1	1	Control	10	-90
A	2	1	Elevated Temperature	30	-70
B	2	1	Elevated Temperature	50	-50
C	2	1	Elevated Temperature	0	-100
D	2	1	Elevated Temperature	30	-70
E	2	1	Elevated Temperature	30	-70
A	1	2	Reduced pH	40	-60
B	1	2	Reduced pH	20	-80
C	1	2	Reduced pH	30	-70
D	1	2	Reduced pH	30	-70
E	1	2	Reduced pH	0	-100
A	2	2	Reduced pH + Elevated Temperature	30	-70
B	2	2	Reduced pH + Elevated Temperature	20	-80
C	2	2	Reduced pH + Elevated Temperature	20	-80
D	2	2	Reduced pH + Elevated Temperature	20	-80
E	2	2	Reduced pH + Elevated Temperature	0	-100
