# Supplementary material for: Ocean acidification changes the vertical movement of stone crab larvae
Source: Biol Lett. 2019 Dec 11;15(12):20190414. doi: 10.1098/rsbl.2019.0414 (PMC6936016; doi:10.1098/rsbl.2019.0414)
Supplement: Stage-V swimming data all [file rsbl20190414supp6.csv]

Brood	Treatment	direction	speed_full		Ocean acidification changes the vertical movement of stone crab larvae
A	Control	up	0.53
A	Control	up	0.07		Authors: Philip M. Gravinese*, Ian C. Enochs, Derek P. Manzello, and Robert van Woesik
A	Control	down	-0.13
A	Control	down	-0.14
A	Control	up	0.14
A	Control	up	0.46
A	Control	up	0.28
A	Control	down	-0.17
A	Control	down	-0.08
A	Control	down	-0.11
B	Control	down	-0.97
B	Control	up	0.82
B	Control	up	0.26
B	Control	down	-0.51
B	Control	down	-0.37
B	Control	down	-0.54
B	Control	up	0.4
B	Control	down	-0.09
B	Control	down	-0.58
B	Control	up	0.5
C	Control	down	-0.38
C	Control	down	-0.53
C	Control	down	-0.32
C	Control	down	-0.78
C	Control	down	-0.89
C	Control	down	-1.01
C	Control	down	-1
C	Control	down	-0.83
C	Control	down	-0.78
C	Control	down	-0.94
D	Control	up	0.19
D	Control	up	0.27
D	Control	up	0.5
D	Control	down	-0.45
D	Control	up	0.03
D	Control	up	0.38
D	Control	down	-1.04
D	Control	down	-1.07
D	Control	up	0.2
D	Control	up	0.3
E	Control	down	-0.26
E	Control	down	-0.27
E	Control	down	-0.3
E	Control	down	-0.73
E	Control	down	-0.29
E	Control	down	-0.23
E	Control	down	-0.28
E	Control	down	-0.37
E	Control	up	0.2
E	Control	down	-0.35
A	Elevated Temperature	down	-0.36
A	Elevated Temperature	up	0.9
A	Elevated Temperature	down	-0.32
A	Elevated Temperature	up	0.23
A	Elevated Temperature	up	0.17
A	Elevated Temperature	down	-0.13
A	Elevated Temperature	down	-0.17
A	Elevated Temperature	down	-0.41
A	Elevated Temperature	down	-0.39
A	Elevated Temperature	down	-0.55
B	Elevated Temperature	down	-0.42
B	Elevated Temperature	down	-0.51
B	Elevated Temperature	down	-0.43
B	Elevated Temperature	down	-0.68
B	Elevated Temperature	up	0.5
B	Elevated Temperature	up	0.42
B	Elevated Temperature	up	0.06
B	Elevated Temperature	up	0.06
B	Elevated Temperature	up	0.48
B	Elevated Temperature	down	-0.12
C	Elevated Temperature	down	-0.82
C	Elevated Temperature	down	-0.72
C	Elevated Temperature	down	-0.77
C	Elevated Temperature	down	-0.92
C	Elevated Temperature	down	-0.77
C	Elevated Temperature	down	-0.63
C	Elevated Temperature	down	-0.82
C	Elevated Temperature	down	-0.79
C	Elevated Temperature	down	-0.78
C	Elevated Temperature	down	-0.96
D	Elevated Temperature	up	0.02
D	Elevated Temperature	down	-0.35
D	Elevated Temperature	down	-0.11
D	Elevated Temperature	down	-0.22
D	Elevated Temperature	down	-0.45
D	Elevated Temperature	up	0.1
D	Elevated Temperature	down	-0.11
D	Elevated Temperature	down	-0.33
D	Elevated Temperature	down	-0.09
D	Elevated Temperature	up	0.11
E	Elevated Temperature	down	-1.18
E	Elevated Temperature	down	-0.73
E	Elevated Temperature	down	-0.25
E	Elevated Temperature	down	-1.17
E	Elevated Temperature	up	0.87
E	Elevated Temperature	down	-0.74
E	Elevated Temperature	up	0.06
E	Elevated Temperature	up	0.09
E	Elevated Temperature	down	-0.7
E	Elevated Temperature	down	-0.64
A	Reduced pH	up	0.31
A	Reduced pH	down	-0.68
A	Reduced pH	down	-0.38
A	Reduced pH	down	-0.8
A	Reduced pH	down	-0.5
A	Reduced pH	up	0.15
A	Reduced pH	up	1.04
A	Reduced pH	up	0.27
A	Reduced pH	down	-0.42
A	Reduced pH	down	-0.5
B	Reduced pH	up	0.23
B	Reduced pH	up	0.39
B	Reduced pH	down	-0.44
B	Reduced pH	down	-0.73
B	Reduced pH	down	-0.41
B	Reduced pH	down	-0.21
B	Reduced pH	down	-0.33
B	Reduced pH	down	-0.66
B	Reduced pH	down	-0.05
B	Reduced pH	down	-0.66
C	Reduced pH	up	0.8
C	Reduced pH	down	-0.25
C	Reduced pH	down	-0.39
C	Reduced pH	down	-0.19
C	Reduced pH	down	-0.2
C	Reduced pH	down	-0.05
C	Reduced pH	up	0.18
C	Reduced pH	up	0.15
C	Reduced pH	down	-0.17
C	Reduced pH	down	-0.45
D	Reduced pH	up	1.57
D	Reduced pH	down	-0.11
D	Reduced pH	down	-0.03
D	Reduced pH	down	-0.92
D	Reduced pH	down	-0.9
D	Reduced pH	up	0.05
D	Reduced pH	down	-0.53
D	Reduced pH	down	-0.8
D	Reduced pH	up	0.42
D	Reduced pH	down	-0.36
E	Reduced pH	down	-1.02
E	Reduced pH	down	-0.87
E	Reduced pH	down	-0.9
E	Reduced pH	down	-1.15
E	Reduced pH	down	-0.9
E	Reduced pH	down	-0.67
E	Reduced pH	down	-1.04
E	Reduced pH	down	-0.9
E	Reduced pH	down	-1.38
E	Reduced pH	down	-0.78
A	Elevated Temperature + Reduced pH	up	0.13
A	Elevated Temperature + Reduced pH	up	0.19
A	Elevated Temperature + Reduced pH	down	-0.47
A	Elevated Temperature + Reduced pH	down	-0.7
A	Elevated Temperature + Reduced pH	down	-0.03
A	Elevated Temperature + Reduced pH	up	0.93
A	Elevated Temperature + Reduced pH	down	-0.47
A	Elevated Temperature + Reduced pH	down	-0.78
A	Elevated Temperature + Reduced pH	down	-0.1
A	Elevated Temperature + Reduced pH	down	-0.6
B	Elevated Temperature + Reduced pH	down	-0.63
B	Elevated Temperature + Reduced pH	down	-0.21
B	Elevated Temperature + Reduced pH	up	0.09
B	Elevated Temperature + Reduced pH	down	-0.38
B	Elevated Temperature + Reduced pH	down	-0.17
B	Elevated Temperature + Reduced pH	down	-0.29
B	Elevated Temperature + Reduced pH	down	-0.13
B	Elevated Temperature + Reduced pH	up	0.88
B	Elevated Temperature + Reduced pH	down	-0.4
B	Elevated Temperature + Reduced pH	down	-1.32
C	Elevated Temperature + Reduced pH	down	-0.27
C	Elevated Temperature + Reduced pH	up	0.65
C	Elevated Temperature + Reduced pH	down	-0.22
C	Elevated Temperature + Reduced pH	down	-0.63
C	Elevated Temperature + Reduced pH	down	-0.44
C	Elevated Temperature + Reduced pH	down	-0.15
C	Elevated Temperature + Reduced pH	down	-0.33
C	Elevated Temperature + Reduced pH	down	-0.41
C	Elevated Temperature + Reduced pH	down	-0.16
C	Elevated Temperature + Reduced pH	up	0.26
D	Elevated Temperature + Reduced pH	down	-0.35
D	Elevated Temperature + Reduced pH	up	0.48
D	Elevated Temperature + Reduced pH	down	-0.5
D	Elevated Temperature + Reduced pH	up	0.22
D	Elevated Temperature + Reduced pH	down	-0.5
D	Elevated Temperature + Reduced pH	down	-0.34
D	Elevated Temperature + Reduced pH	down	-0.48
D	Elevated Temperature + Reduced pH	down	-0.47
D	Elevated Temperature + Reduced pH	down	-0.49
D	Elevated Temperature + Reduced pH	down	-0.89
E	Elevated Temperature + Reduced pH	down	-0.42
E	Elevated Temperature + Reduced pH	down	-0.9
E	Elevated Temperature + Reduced pH	down	-0.75
E	Elevated Temperature + Reduced pH	down	-0.84
E	Elevated Temperature + Reduced pH	down	-0.48
E	Elevated Temperature + Reduced pH	down	-0.8
E	Elevated Temperature + Reduced pH	down	-0.58
E	Elevated Temperature + Reduced pH	down	-0.31
E	Elevated Temperature + Reduced pH	down	-0.79
E	Elevated Temperature + Reduced pH	down	-0.62
