# Supplementary material for: Ocean acidification changes the vertical movement of stone crab larvae
Source: Biol Lett. 2019 Dec 11;15(12):20190414. doi: 10.1098/rsbl.2019.0414 (PMC6936016; doi:10.1098/rsbl.2019.0414)
Supplement: Water chemistry data [file rsbl20190414supp2.csv]

Treatment	Temperature	Salinity	pH_Total	Total alkalinity (�equiv kg-1)	pCO2	Date		Ocean acidification changes the vertical movement of stone crab larvae
Control	30.3	37.1	8.04	2269	483.7	26-May
Control	30	37.2	8.03	2263.3	490.59	26-May		Authors: Philip M. Gravinese*, Ian C. Enochs, Derek P. Manzello, and Robert van Woesik
Control	30.1	37.2	8.03	2290.2	491.5	26-May
Control	30.4	37	8.03	2254.3	496.22	26-May
Control	30	37	8.03	2316.9	495.67	31-May
Control	30.2	37.1	8.06	2314.3	459.87	31-May
Control	30	37.2	8.08	2316.5	438.02	31-May
Control	30.3	37	8.06	2317.7	458.27	31-May
Control	30.1	37.2	8.03	2301.8	498.82	5-Jun
Control	30.3	37.2	8.03	2332.3	504.59	5-Jun
Control	30.1	37.1	8.06	2332.6	466.65	5-Jun
Control	30.3	37	8.03	2334.1	502.66	5-Jun
Control	30.1	37.3	8.02	2338.4	516.16	13-Jun
Control	29.8	37.3	8.01	2334.3	522.69	13-Jun
Control	30	37.3	8.04	2330.4	483.73	13-Jun
Control	30	37.1	8.05	2319	472.31	13-Jun
Control	30.1	37.8	8.02	2209.5	492.47	16-Jun
Control	30.2	37.9	8.01	2213.1	505.57	16-Jun
Control	30	38	8.02	2209.7	487.02	16-Jun
Control	30	37.8	8.03	2206.5	466.15	16-Jun
Control	30.1	37.9	8.03	2261.7	485.97	21-Jun
Control	30.2	37.9	8.07	2246.5	429.53	21-Jun
Control	30.2	37.9	8.06	2249.8	443.37	21-Jun
Control	30	37.9	8.07	2252.5	433.16	21-Jun
Control	29.9	38.1	8.07	2272	426.77	26-Jun
Control	30	38.1	8.08	2275.9	422.28	26-Jun
Control	30	38.2	8.09	2269.3	411.33	26-Jun
Control	30.1	38.3	8.07	2268.6	427.76	26-Jun
Control	30.4	38.2	8.02	2305.9	508.19	8-Jul
Control	30	38.1	8.03	2304.2	489.49	8-Jul
Control	29.7	38.3	8.03	2316.6	492.51	8-Jul
Control	29.5	38.2	8.06	2309.6	443.79	8-Jul
Control	29.6	38.1	8.08	2331.7	429.23	11-Jul
Control	30	38.1	8.06	2330.5	454.24	11-Jul
Control	30.3	38.3	8.06	2334.1	458.38	11-Jul
Control	29.3	38.2	8.08	2328.4	416.27	11-Jul
Control	29.7	38.3	8.08	2259.5	416.76	16-Jul
Control	29.8	38.4	8.08	2258.9	419.82	16-Jul
Control	30.2	38.3	8.07	2263.1	433.17	16-Jul
Control	30	38.2	8.08	2260.6	413.14	16-Jul
Control	29.8	37.7	8.09	2262.9	410.57	27-Jul
Control	29.9	37.8	8.07	2281.2	438.3	27-Jul
Control	30.3	37.8	8.07	2272.6	437.24	27-Jul
Control	29.9	37.7	8.09	2269.2	402.8	27-Jul
Control	29.8	38.1	8.06	2272.4	436.41	30-Jul
Control	29.8	38.2	8.06	2265.2	442.95	30-Jul
Control	30.1	38.3	8.06	2274.2	449.2	30-Jul
Control	30	38.1	8.08	2269.4	425.85	30-Jul
Control	29.8	38.2	8.05	2275.5	455.29	4-Aug
Control	29.9	38.2	8.03	2350.4	501.06	4-Aug
Control	30.3	38.1	7.99	2297.1	555.16	4-Aug
Control	29.6	38.3	8.04	2279.3	469.26	4-Aug
Elevated temperature	31.9	37.7	8.03	2253.3	517.27	26-May
Elevated temperature	31.8	37	8.02	2263	539.56	26-May
Elevated temperature	31.7	37.2	8	2262.7	564.67	26-May
Elevated temperature	32	37	8.01	2264.3	557.15	26-May
Elevated temperature	31.8	37.1	8.03	2306.5	539.76	31-May
Elevated temperature	31.8	37.1	8.03	2315.3	539.42	31-May
Elevated temperature	31.8	37.1	8.03	2315.9	533.77	31-May
Elevated temperature	31.8	37.3	8.02	2317	544.83	31-May
Elevated temperature	31.8	37.1	7.99	2296	586.54	5-Jun
Elevated temperature	31.7	37.1	7.99	2294.2	592.15	5-Jun
Elevated temperature	31.8	37.3	7.99	2333.5	597.49	5-Jun
Elevated temperature	31.9	37.1	8	2331.6	588.15	5-Jun
Elevated temperature	31.8	37.4	7.99	2322.1	592.91	13-Jun
Elevated temperature	31.8	37.3	7.99	2335.5	599.69	13-Jun
Elevated temperature	31.7	37.2	7.99	2332.2	591.76	13-Jun
Elevated temperature	31.7	37.2	8	2322.3	574.88	13-Jun
Elevated temperature	31.9	37.9	7.98	2208.8	587.53	16-Jun
Elevated temperature	31.7	38.2	7.97	2211.4	589.28	16-Jun
Elevated temperature	31.7	38.1	7.99	2210.2	569.01	16-Jun
Elevated temperature	31.7	38.1	7.98	2207.4	573.49	16-Jun
Elevated temperature	31.8	38.1	7.98	2267.5	597.56	21-Jun
Elevated temperature	31.8	38.1	7.98	2261.6	599.59	21-Jun
Elevated temperature	31.9	38.1	8.01	2249.8	553.37	21-Jun
Elevated temperature	32	38	8.01	2270.3	552.44	21-Jun
Elevated temperature	32	38.3	8.01	2269.3	546.01	26-Jun
Elevated temperature	31.7	38.1	8.02	2270.1	537.23	26-Jun
Elevated temperature	31.8	38.3	8.03	2277.4	526.9	26-Jun
Elevated temperature	32	38.3	8.03	2261.2	523.34	26-Jun
Elevated temperature	32	38.3	7.96	2306.5	646.32	8-Jul
Elevated temperature	31.9	38.3	7.98	2309.5	611.62	8-Jul
Elevated temperature	31.8	38.2	7.97	2308.6	632.39	8-Jul
Elevated temperature	32.3	38.4	7.94	2310.3	681.75	8-Jul
Elevated temperature	32	38.2	8	2333.7	589.42	11-Jul
Elevated temperature	31.9	38.3	8	2332.4	582.16	11-Jul
Elevated temperature	32.1	38.4	7.99	2333.9	598.86	11-Jul
Elevated temperature	32.1	38.3	8	2329.2	588.92	11-Jul
Elevated temperature	31.8	38.4	7.99	2252.7	572.99	16-Jul
Elevated temperature	32	38.4	7.98	2259.2	594.82	16-Jul
Elevated temperature	32	38.4	8.01	2252.3	550.82	16-Jul
Elevated temperature	31.6	38.4	8.03	2265.7	517.04	16-Jul
Elevated temperature	31.8	37.8	8.03	2265.5	515.96	27-Jul
Elevated temperature	31.7	37.9	8.03	2275	523.31	27-Jul
Elevated temperature	31.9	37.9	8.01	2271	550.93	27-Jul
Elevated temperature	31.8	37.8	8.04	2272.3	506.61	27-Jul
Elevated temperature	31.6	38.3	8	2271.6	557.89	30-Jul
Elevated temperature	31.7	38.3	8	2268.5	565.91	30-Jul
Elevated temperature	31.9	38.2	8.01	2272.9	554.07	30-Jul
Elevated temperature	31.8	38.3	8.03	2275.6	513.21	30-Jul
Elevated temperature	31.8	38.2	7.94	2274.6	663.8	4-Aug
Elevated temperature	31.8	38.3	7.97	2276.7	612.11	4-Aug
Elevated temperature	32	38.4	7.97	2276.4	616.45	4-Aug
Elevated temperature	31.9	38.4	8	2272	569.04	4-Aug
Reduced pH	30	37.2	7.83	2265.3	833.02	26-May
Reduced pH	30.2	37.1	7.8	2269.8	921.25	26-May
Reduced pH	30.2	37.1	7.82	2262.9	870.42	26-May
Reduced pH	30.4	37.1	7.81	2254.9	897.2	26-May
Reduced pH	30	37.2	7.72	2306.2	1135.98	31-May
Reduced pH	30.1	37.1	7.72	2309	1133.45	31-May
Reduced pH	30	37.1	7.74	2305.5	1070.47	31-May
Reduced pH	29.8	37.2	7.72	2319.6	1142.2	31-May
Reduced pH	30.2	37.1	7.68	2296.5	1272.7	5-Jun
Reduced pH	30	37.2	7.71	2301.3	1171.4	5-Jun
Reduced pH	30	37.1	7.69	2328.7	1244.35	5-Jun
Reduced pH	30.2	37.2	7.66	2326.5	1344.05	5-Jun
Reduced pH	30.3	37.2	7.76	2342	1042.71	13-Jun
Reduced pH	29.8	37.2	7.75	2341.1	1055.91	13-Jun
Reduced pH	30	37.1	7.77	2343.7	1013.75	13-Jun
Reduced pH	30.1	37.2	7.79	2329.8	973.14	13-Jun
Reduced pH	29.8	37.8	7.71	2220.2	1124.24	16-Jun
Reduced pH	30	37.8	7.71	2218.8	1109.74	16-Jun
Reduced pH	29.8	38.1	7.7	2211.5	1127.64	16-Jun
Reduced pH	30.3	37.9	7.7	2218.3	1154.47	16-Jun
Reduced pH	30	38	7.76	2249.3	990.72	21-Jun
Reduced pH	30	38.1	7.77	2251	967.05	21-Jun
Reduced pH	30.1	37.8	7.77	2252.2	980.55	21-Jun
Reduced pH	30.2	37.9	7.76	2250.5	1000.85	21-Jun
Reduced pH	30.1	38.2	7.87	2273.7	755.38	26-Jun
Reduced pH	30	38.2	7.87	2269.3	759.26	26-Jun
Reduced pH	30	38.2	7.87	2277	760.8	26-Jun
Reduced pH	30.2	38.3	7.88	2267.2	745.14	26-Jun
Reduced pH	30.2	38.2	7.78	2297.9	965.75	8-Jul
Reduced pH	30.2	38	7.78	2304.8	979.59	8-Jul
Reduced pH	29.8	38.3	7.8	2314.1	908.53	8-Jul
Reduced pH	29.1	38.2	7.83	2303.9	817.35	8-Jul
Reduced pH	30.4	38.2	7.74	2341.6	1117.5	11-Jul
Reduced pH	29.9	38.1	7.75	2334.4	1054.41	11-Jul
Reduced pH	29.7	38.1	7.77	2335.4	1001.19	11-Jul
Reduced pH	29.1	38.1	7.79	2340.8	917.16	11-Jul
Reduced pH	30.2	38.4	7.72	2266.7	1110.57	16-Jul
Reduced pH	30.2	38.3	7.71	2260.1	1137.99	16-Jul
Reduced pH	29.7	38.2	7.76	2268.1	992.37	16-Jul
Reduced pH	29	38.3	7.79	2262.1	888.19	16-Jul
Reduced pH	30.2	38	7.84	2296.7	827.36	27-Jul
Reduced pH	30.3	37.8	7.83	2289	845.33	27-Jul
Reduced pH	29.9	37.7	7.86	2284.4	767.2	27-Jul
Reduced pH	29.3	37.8	7.86	2278.1	755.15	27-Jul
Reduced pH	30.4	38.4	7.85	2259	792.59	30-Jul
Reduced pH	29.9	38.2	7.86	2259.6	771.67	30-Jul
Reduced pH	29.7	38.2	7.89	2267.8	711.14	30-Jul
Reduced pH	29.2	38.1	7.89	2269.8	694.22	30-Jul
Reduced pH	30.4	38.1	7.78	2291.5	970.06	4-Aug
Reduced pH	30	38	7.79	2288.3	943.24	4-Aug
Reduced pH	29.8	37.9	7.85	2291.7	797.42	4-Aug
Reduced pH	29.2	38	7.81	2299.7	871.93	4-Aug
Reduced pH + Elevated Temperature	32	37.5	7.83	2252.2	889.23	26-May
Reduced pH + Elevated Temperature	31.8	37.2	7.76	2269.1	1091.8	26-May
Reduced pH + Elevated Temperature	31.8	37.3	7.77	2254.5	1042.73	26-May
Reduced pH + Elevated Temperature	32	37.3	7.75	2255	1093.4	26-May
Reduced pH + Elevated Temperature	31.6	37.3	7.7	2304.5	1266.72	31-May
Reduced pH + Elevated Temperature	31.9	37.2	7.73	2304.9	1199.63	31-May
Reduced pH + Elevated Temperature	31.9	37.2	7.71	2309.2	1242.86	31-May
Reduced pH + Elevated Temperature	31.8	37.3	7.7	2313.9	1295.73	31-May
Reduced pH + Elevated Temperature	31.8	37.3	7.71	2296.2	1247.38	5-Jun
Reduced pH + Elevated Temperature	31.8	37	7.68	2292	1338.17	5-Jun
Reduced pH + Elevated Temperature	31.8	37.3	7.68	2327.1	1347.83	5-Jun
Reduced pH + Elevated Temperature	31.8	37.2	7.65	2328	1458.93	5-Jun
Reduced pH + Elevated Temperature	31.9	37.4	7.74	2341.5	1189.77	13-Jun
Reduced pH + Elevated Temperature	31.7	37.3	7.74	2350.4	1172.55	13-Jun
Reduced pH + Elevated Temperature	31.9	37.3	7.74	2337.1	1171.24	13-Jun
Reduced pH + Elevated Temperature	31.7	37.2	7.75	2334.1	1146.91	13-Jun
Reduced pH + Elevated Temperature	31.8	37.8	7.69	2216.2	1241.97	16-Jun
Reduced pH + Elevated Temperature	31.8	38.1	7.69	2210.3	1241.06	16-Jun
Reduced pH + Elevated Temperature	31.8	38	7.69	2213.8	1241.18	16-Jun
Reduced pH + Elevated Temperature	31.8	37.8	7.69	2211.6	1261.19	16-Jun
Reduced pH + Elevated Temperature	31.7	38.1	7.71	2271.2	1226.09	21-Jun
Reduced pH + Elevated Temperature	32	38	7.7	2263.8	1247.42	21-Jun
Reduced pH + Elevated Temperature	31.8	38.1	7.72	2250.6	1186.42	21-Jun
Reduced pH + Elevated Temperature	31.9	38.1	7.71	2253.1	1218.29	21-Jun
Reduced pH + Elevated Temperature	31.8	38.3	7.82	2274.2	927.67	26-Jun
Reduced pH + Elevated Temperature	31.9	39.3	7.81	2273	932.11	26-Jun
Reduced pH + Elevated Temperature	31.8	38.2	7.85	2272.6	856.37	26-Jun
Reduced pH + Elevated Temperature	32	38.4	7.82	2265.8	912.24	26-Jun
Reduced pH + Elevated Temperature	31.8	38.3	7.74	2300.1	1158.39	8-Jul
Reduced pH + Elevated Temperature	31.9	38.4	7.73	2306	1166.74	8-Jul
Reduced pH + Elevated Temperature	31.7	38.4	7.75	2301.5	1115.93	8-Jul
Reduced pH + Elevated Temperature	31.7	38.4	7.75	2304.1	1102.85	8-Jul
Reduced pH + Elevated Temperature	31.9	38.2	7.7	2345.9	1283.71	11-Jul
Reduced pH + Elevated Temperature	31.8	38.4	7.71	2340.3	1244.25	11-Jul
Reduced pH + Elevated Temperature	31.9	38.3	7.71	2334.4	1252.3	11-Jul
Reduced pH + Elevated Temperature	30.3	38.3	7.75	2338.5	1084.47	11-Jul
Reduced pH + Elevated Temperature	31.7	38.2	7.69	2271.7	1288.11	16-Jul
Reduced pH + Elevated Temperature	31.6	38.6	7.69	2271.9	1275.07	16-Jul
Reduced pH + Elevated Temperature	31.8	38.4	7.7	2268.1	1239.19	16-Jul
Reduced pH + Elevated Temperature	30.9	38.5	7.71	2255.2	1184.21	16-Jul
Reduced pH + Elevated Temperature	31.7	37.8	7.8	2280.6	963.5	27-Jul
Reduced pH + Elevated Temperature	31.9	38.1	7.8	2282	978.5	27-Jul
Reduced pH + Elevated Temperature	31.7	38	7.8	2284.8	964.26	27-Jul
Reduced pH + Elevated Temperature	31.9	38	7.8	2283.3	979.3	27-Jul
Reduced pH + Elevated Temperature	31.7	38.3	7.8	2262.3	955.13	30-Jul
Reduced pH + Elevated Temperature	31.8	38.4	7.8	2260.4	965.08	30-Jul
Reduced pH + Elevated Temperature	31.9	38.5	7.83	2265.6	891.16	30-Jul
Reduced pH + Elevated Temperature	31.8	38.4	7.81	2261.4	941.78	30-Jul
Reduced pH + Elevated Temperature	31.7	38.2	7.75	2286.7	1113.28	4-Aug
Reduced pH + Elevated Temperature	31.7	38.2	7.75	2287.7	1109.08	4-Aug
Reduced pH + Elevated Temperature	31.8	38.3	7.75	2287.6	1110.32	4-Aug
Reduced pH + Elevated Temperature	31	38.1	7.75	2288.1	1090.77	4-Aug
